# Supplementary material
Source: PubMed Central journal article supplement (PMC1765431)

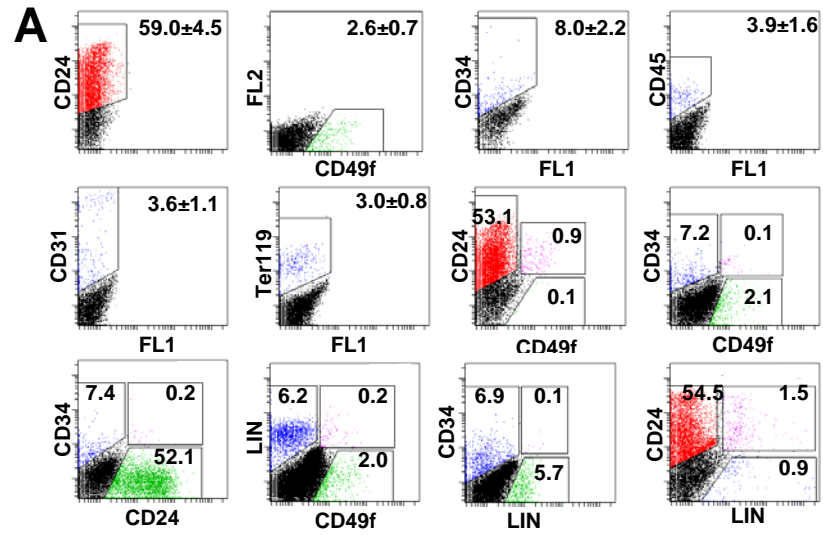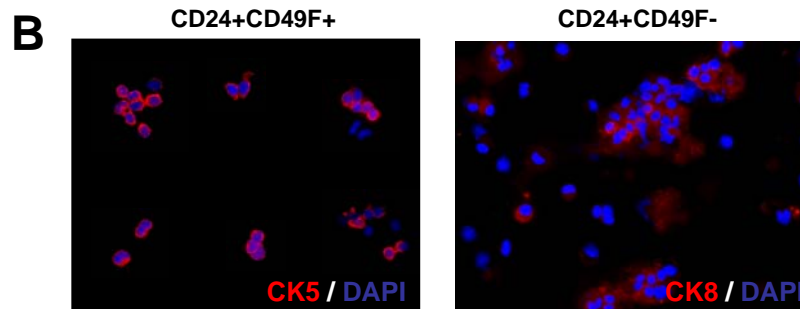

Supplement: pnas_0609684104_1.pdf [file pnas_0609684104_1.pdf]

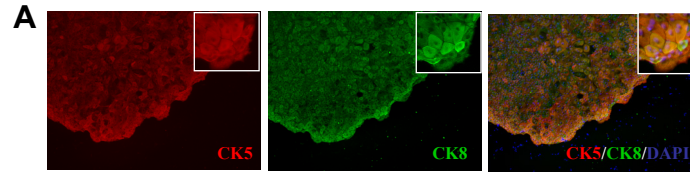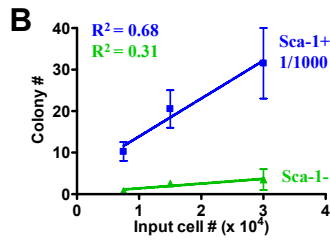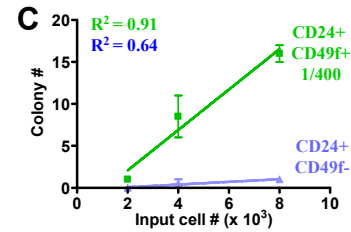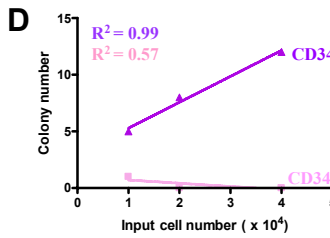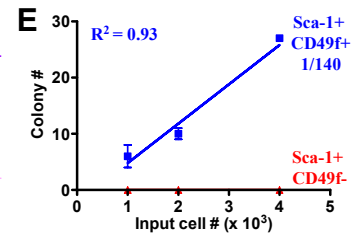

**F**

| Population       | CFU in vitro | Fold enriched |
|------------------|--------------|---------------|
| Total            | 1/2200       |               |
| Sca-1+           | 1/1000       | 2             |
| CD24+CD49f+      | 1/400        | 6             |
| Sca-1+CD49f+     | 1/140        | 15            |
| Lin-Sca-1+CD49f+ | 1/35         | 60            |

Supplement: pnas_0609684104_2.pdf [file pnas_0609684104_2.pdf]

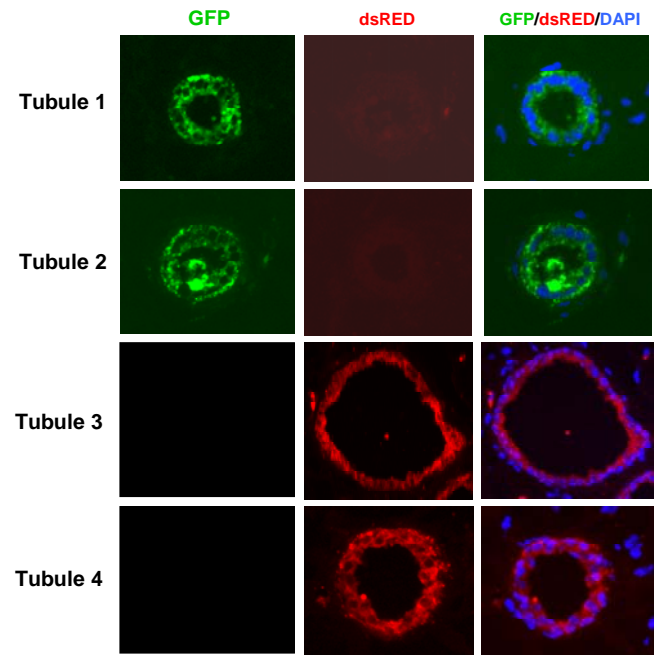

Supplement: pnas_0609684104_3.pdf [file pnas_0609684104_3.pdf]
